# Supplementary material for: Educating or academic integrity: effectiveness of a digital resource on plagiarism awareness among postgraduate bioscience students
Source: Research Square preprint supplement (doi:10.21203/rs.3.rs-7973068/v1), 2026-02-18
Supplement: Supplementary file 2 [file 93dffc089e2d330a4fac6666.docx]

# **Additional File 1 - Unformatted Qualtrics survey with comments**

Privacy Notice

You are being invited to take part in an educational research study entitled:

Evaluation of the content and impact of a new Moodle resource (Good Academic Practice in MVLS) on attitudes and perspectives towards plagiarism behaviour among PGT students in MVLS

Before you decide, it is important for you to understand why the research is being done and what it will involve. Please take time to read the following information carefully and discuss it with others if you wish. Please contact the lead researcher if there is anything that is not clear or if you would like more information. If you decide to take part in this study, you will be given a copy of this Participant Information Sheet and the signed consent form to keep.

Your Personal Data

The University of Glasgow will be what is known as the ‘Data Controller’ of your personal data processed in relation to taking part in the School of Medicine, Dentistry and Nursing Athena Swan Staff Consultation 2024. This privacy notice will explain how the University of Glasgow will process your personal data.

What data we collect

The personal data we will be collecting in relation to the survey includes Gender, Ethnicity, Disability, Sexual Orientation and Caring Responsibilities.

The survey does not ask for any information which would be used to identify an individual respondent; however it does contain free-text comments boxes. Respondents are prompted not to provide any information in these boxes which may identify them.

Special Categories of Personal Data

The special categories of data we will be collecting in relation to the survey are:

- Gender
- Race/Ethnicity
- Disability
- Sexual orientation

Legal basis for processing your data

We must have a legal basis for processing all personal data. In this instance, the legal basis is legitimate interests.

The legal basis for processing special categories data, such as gender information, is explicit consent. If you choose to supply this information we will treat this as you giving your explicit consent.

What we do with the data collected

We are collecting and processing data as outlined in this Privacy Notice as part of your participation in the survey and may use it in order to carry out analysis and produce reports:

- On the challenges faced by staff from underrepresented groups.
- Understand the environment it provides for its staff.
- What, if any improvement may be needed to ensure equality of opportunity.
- The survey explores staff experience, knowledge and views on how the School promotes and manages gender equality.

Grade information will be used to establish whether the survey results vary by the available groups and on its own cannot be used to identify an individual.

The free-text comments boxes are accompanied by prompts to remind participants to avoid providing any information which may directly or indirectly identify them.

In addition to this, free-text responses will be cleansed to remove any identifiers (e.g. names) as part of the analysis by a controlled team of no more than 1 individua(s) within the Team/School etc.

In addition to being cleansed, free-text comments will only (even in their cleansed format) be reported more widely in an amalgamated summary format in order to ensure anonymity.

Who we share the data with

We share your personal data with XM Qualtrics survey software, a third party company used by the University to host and collect survey data for hosting of survey and data collection.

How long do we keep it for?

The original ‘raw’ survey response data will be retained by the University for a maximum period of 12 months after the survey closes. After this time, data will be securely deleted and only fully anonymised statistical/summary data will be retained for future analysis and benchmarking.

XM Qualtrics keeps backup copies for a maximum of 3 months after deletion of the survey.

What are your rights?

You can request access to the information we process about you at any time. If at any point you believe that the information we process relating to you is incorrect, you can request to see this information and may in some instances request to have it restricted, corrected or, erased. You may also have the right to object to the processing of data and the right to data portability.

If you wish to exercise any of these rights, please submit your request via the webform or contact dp@gla.ac.uk.

Please note that the ability to exercise these rights will vary and depend on the legal basis on which the processing is being carried out and the accessibility of the data (i.e. if your own data is impossible to retrieve due to the anonymous nature of the survey).

Where we have relied upon your consent to process your data, you also have the right to withdraw your consent at any time.

Complaints

If you wish to raise a complaint on how we have handled your personal data, you can contact the University Data Protection Officer who will investigate the matter. Our Data Protection Officer can be contacted at dataprotectionofficer@glasgow.ac.uk.

If you are not satisfied with our response or believe we are not processing your personal data in accordance with the law, you can complain to the Information Commissioner’s Office (ICO) https://ico.org.uk/.

Thank you for taking the time to provide your views and opinions.

Consent

Please answer all questions on the consent form page.

I confirm that I have read and understood the Participant Information Sheet

☐ Yes

☐ No

I have had the opportunity to think about the information and ask questions, and understand the answers I have been given.

☐ Yes

☐ No

I understand that my participation is voluntary and that I am free to withdraw at any time prior to submission of responses, without giving any reason, without my legal rights being affected.

☐ Yes

☐ No

I understand that once submitted, my data cannot be withdrawn.

☐ Yes

☐ No

I understand that all data and information I provide will be kept confidential and will be seen only by study researchers and regulators whose job it is to check the work of researchers.

☐ Yes

☐ No

I confirm that I agree to the way my data will be collected and in accordance with University guidelines and relevant Data Protection policies and regulations.

☐ Yes

☐ No

I agree to take part in the study.

☐ Yes

☐ No

About YouPlease select the School in which your programme/course is taught:

☐ School of Biodiversity, One Health & Veterinary Medicine

☐ School of Cancer Sciences

☐ School of Cardiovascular & Metabolic Health

☐ School of Health & Wellbeing

☐ School of Infection & Immunity

☐ School of Medicine, Dentistry & Nursing

☐ School of Molecular Biosciences

☐ School of Psychology & Neuroscience

☐ Prefer not to say

I am:

☐ From the UK

☐ From the EU

☐ From another country

☐ Prefer not to say

I have previously completed a degree in the UK:

☐ Yes

☐ No

☐ Prefer not to respond

Please could you indicate your age group:

☐ Less than 25

☐ 25 and over

☐ Prefer not to respond

I identify my gender as:

☐ Cis male

☐ Cis female

☐ Trans male

☐ Trans female

☐ Non-binary/non-conforming

☐ Other

☐ Prefer not to respond

Knowledge of Plagiarism

According to your knowledge of plagiarism, give a response to each of the questions below:

|  | Strongly disagree | Disagree | Neither agree nor disagree | Agree | Strongly disagree |
| --- | --- | --- | --- | --- | --- |
| I understand what plagiarism is. |  |  |  |  |  |
| I understand the impact of plagiarism on academic integrity. |  |  |  |  |  |
| I know where to find the University rules and regulations relating to plagiarism. |  |  |  |  |  |
| I understand what the rules and regulations relating to plagiarism mean. |  |  |  |  |  |
| I understand what is expected of me as a student regarding my academic conduct. |  |  |  |  |  |
| I have enough knowledge and skills to help me avoid plagiarism. |  |  |  |  |  |
| I know the steps I should follow to avoid plagiarism. |  |  |  |  |  |
| I know where to find help and support to avoid plagiarism. |  |  |  |  |  |
| I understand the potential consequences of plagiarism on my academic career. |  |  |  |  |  |

What would you like to know more about with respect to plagiarism? Is there anything else you would like to add?

For each question, please indicate to what extent you would consider this scenario to be plagiarism:

|  | Definetly not  plagiarism | I do not think  it is plagiarism | I am not sure | I do think it is  plagiarism | Definetly  plagiarism |
| --- | --- | --- | --- | --- | --- |
| Quoting someone’s writing without acknowledgement |  |  |  |  |  |
| Listing sources in the reference list, but not acknowledging them in the assignment |  |  |  |  |  |
| Changing the order of words in a sentence taken directly from a source |  |  |  |  |  |
| Copying figures from someone else’s work, without citation |  |  |  |  |  |
| Submitting AI-generated content as your own |  |  |  |  |  |
| Resubmitting your own work from a previous degree or course assessment |  |  |  |  |  |

Academic Skills and Referencing

For each question, please give a response from 1 (Strongly disagree) to 5 (Strongly agree).

According to your academic skills and referencing knowledge, give a response to each of the questions below:

|  | Strongly disagree | Disagree | Neither agree nor disagree | Agree | Strongly disagree |
| --- | --- | --- | --- | --- | --- |
| I know how to critically appraise sources in my own writing. |  |  |  |  |  |
| I know how to appropriately quote from sources. |  |  |  |  |  |
| I know how to integrate sources into my own writing. |  |  |  |  |  |
| I know how to synthesise ideas from multiple sources. |  |  |  |  |  |
| I know how to appropriately paraphrase from sources. |  |  |  |  |  |
| I know how to acknowledge sources. |  |  |  |  |  |
| I know how to prepare a reference list of sources cited in my work. |  |  |  |  |  |
| I am familiar with the most conventional reference style for my discipline. |  |  |  |  |  |
| I find it easy expressing key concepts in my own words. |  |  |  |  |  |
| I get higher marks by writing more  of my assignment in my own words. |  |  |  |  |  |

Using Turnitin

For each question, please give a response from 1 (Strongly disagree) to 5 (Strongly agree).

According to your skills in using Turnitin, give a response to each of the questions below:

|  | Strongly disagree | Disagree | Neither agree nor disagree | Agree | Strongly disagree |
| --- | --- | --- | --- | --- | --- |
| I know how to use Turnitin when submitting assignments. |  |  |  |  |  |
| I know how to navigate the Turnitin Similarity Report to identify potential problems in my work. |  |  |  |  |  |
| I know how to interpret the Turnitin Similarity Report for my work. |  |  |  |  |  |
| A low Turnitin score means I have not plagiarised. |  |  |  |  |  |

Moodle Content and Design

For each question, please give a response from 1 (Strongly disagree) to 5 (Strongly agree).

According to the content and design of this specific Moodle course (resource), give a response to each of the questions below:

|  | Strongly disagree | Disagree | Neither agree nor disagree | Agree | Strongly disagree |
| --- | --- | --- | --- | --- | --- |
| The resource has enhanced my knowledge and understanding of plagiarism. |  |  |  |  |  |
| The resource has enhanced my ability to avoid plagiarism. |  |  |  |  |  |
| The resource has enhanced my knowledge and understanding of referencing. |  |  |  |  |  |
| The resource has enhanced my ability to reference my work. |  |  |  |  |  |
| The resource has enhanced my knowledge and understanding of using Turnitin. |  |  |  |  |  |
| The resource has enhanced my ability to use Turnitin to check my work. |  |  |  |  |  |
| The content of the Moodle course is sufficiently detailed to aid my understanding. |  |  |  |  |  |
| The content of the Moodle course is sufficiently engaging to hold my interest. |  |  |  |  |  |
| The design of the Moodle is structured well and can be navigated through easily. |  |  |  |  |  |
| The one page summary is a useful reference to help me avoid plagiarism. |  |  |  |  |  |

What did you find was beneficial about the content of the Moodle and why?

What enhancements could be made to the content of the Moodle for the benefit of students and why?

What did you find was beneficial with respect to the design of the Moodle and why?

What enhancements to the design of the Moodle could be made for the benefit of students and why?

We thank you for your time spent taking this survey.

Your response has been recorded.
